# Supplementary material for: Arthrospira platensis (Spirulina) fortified functional foods ameliorate iron and protein malnutrition by improving growth and modulating oxidative stress and gut microbiota in rats
Source: Royal Society of Chemistry journal article supplement (doi:10.1039/d2fo02226e), 2022-12-19
Supplement: d2fo02226e1.pdf [file d2fo02226e1.pdf]

### Supplementary data

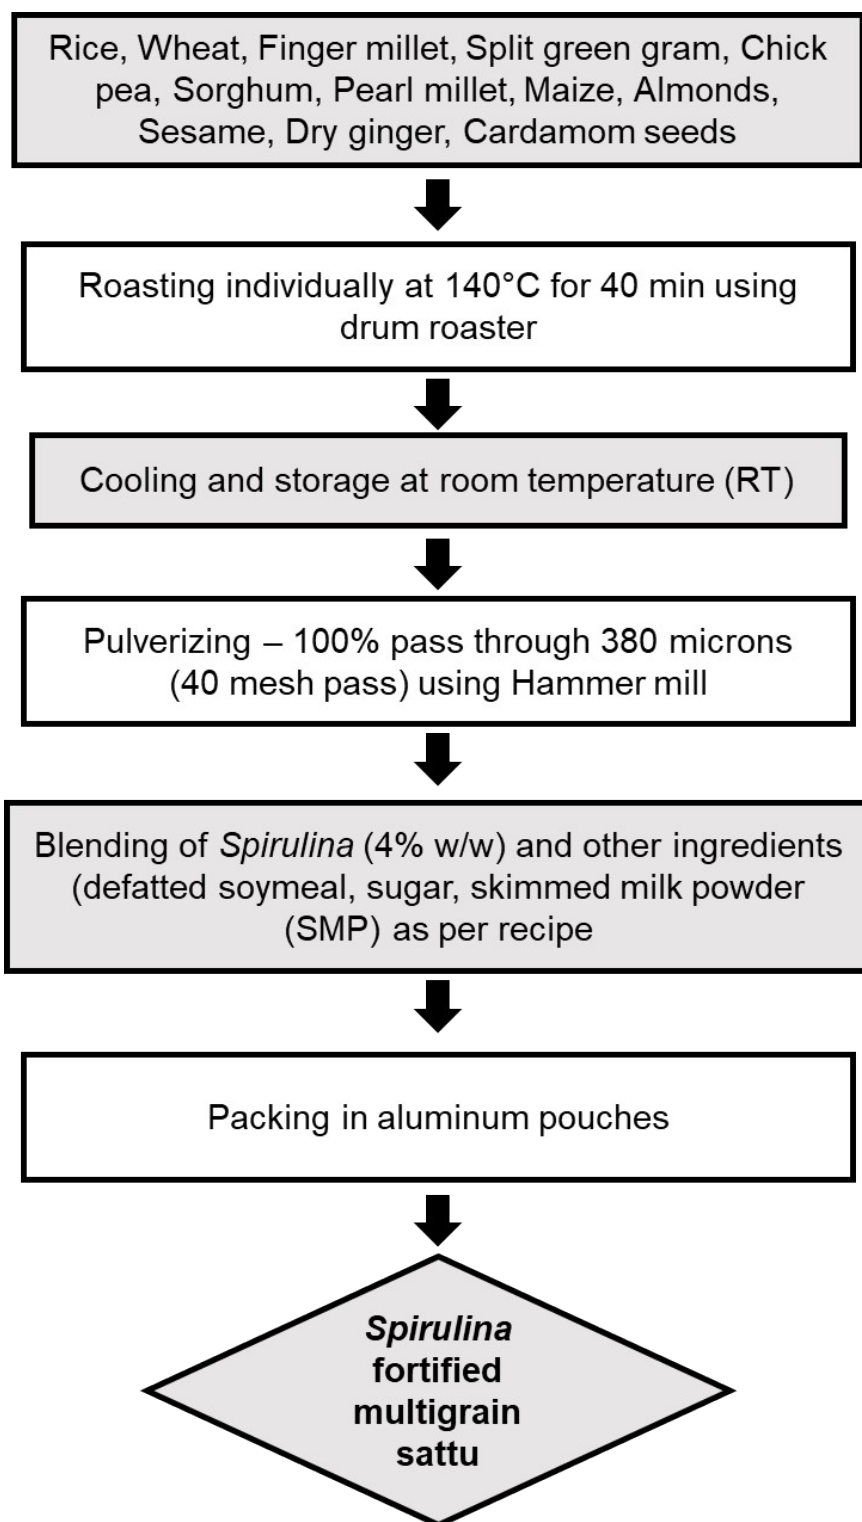

Fig. S1: Process flowchart for preparation of *Spirulina* fortified sattu

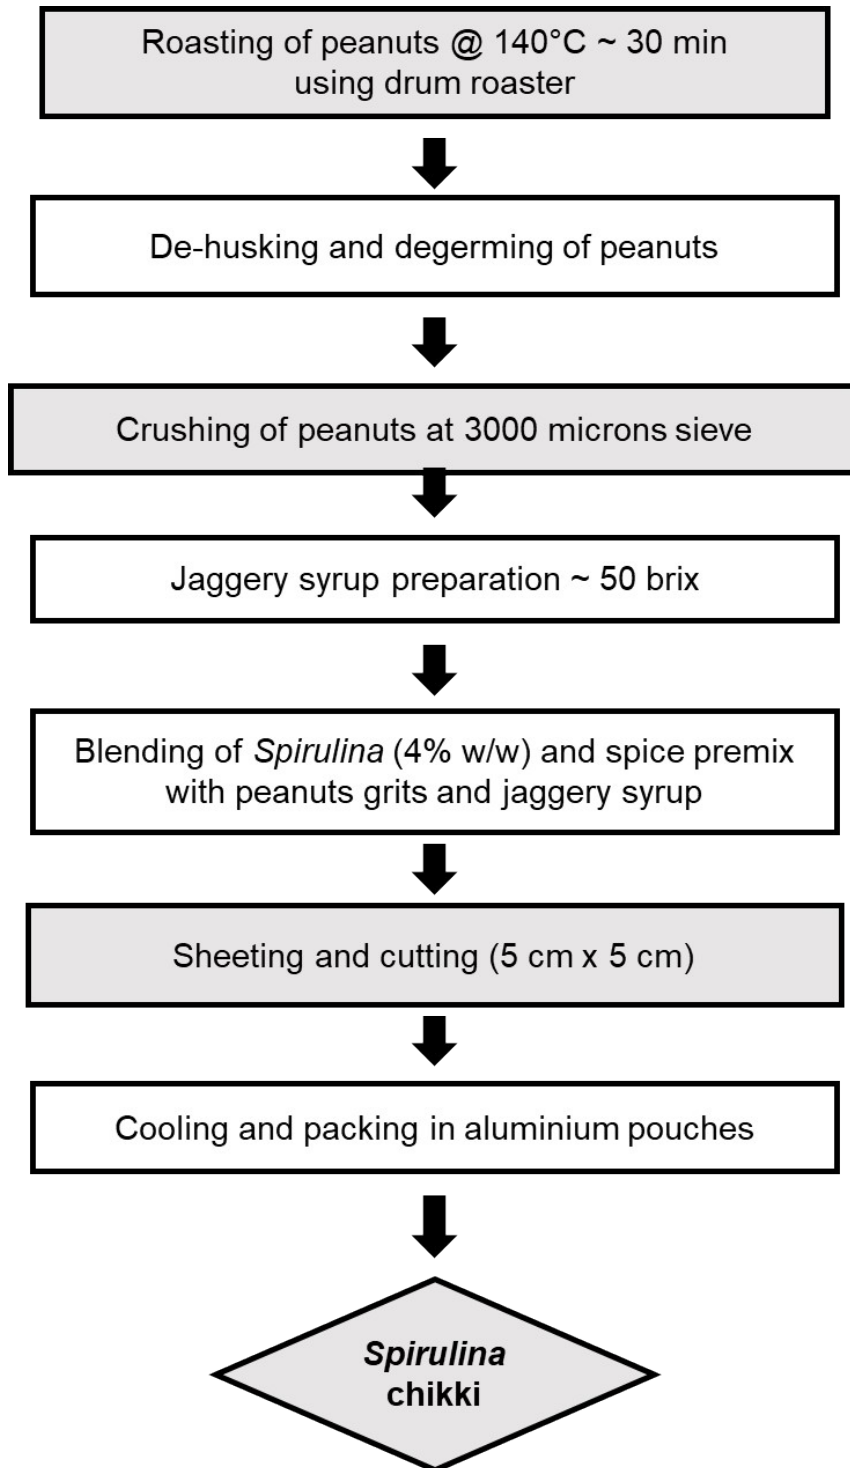

Fig. S2: Process flowchart for preparation of *Spirulina* fortified chikki

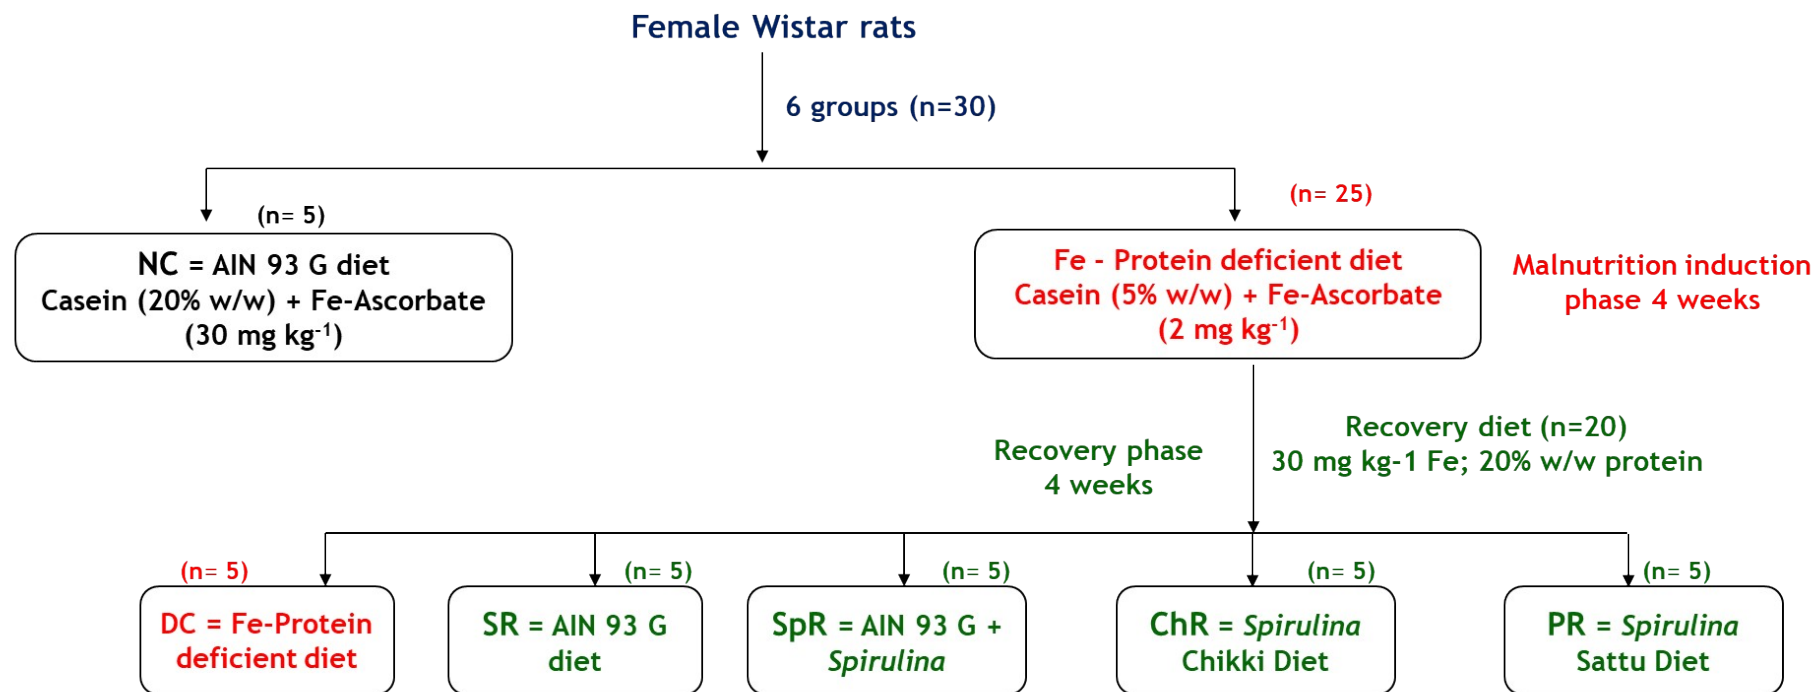

NC = Normal Control; DC = Disease control; SR = Standard recovery; SpR = *Spirulina* recovery; ChR = Chikki recovery; PR = Sattu recovery

**Fig. S3: Experimental design for evaluating the nutritional quality of *Spirulina* fortified food products**

**Table S1: Composition of modified Zarrouk's medium for cultivation of *Spirulina platensis***

| <b>Component</b>                               | <b>Concentration (g/l)</b> |
|------------------------------------------------|----------------------------|
| NaHCO <sub>3</sub>                             | 8.00                       |
| NaNO <sub>3</sub>                              | 2.50                       |
| NaCl                                           | 1.00                       |
| K <sub>2</sub> HPO <sub>4</sub>                | 0.50                       |
| K <sub>2</sub> SO <sub>4</sub>                 | 1.00                       |
| MgSO <sub>4</sub> .7H <sub>2</sub> O           | 0.20                       |
| CaCl <sub>2</sub> .2H <sub>2</sub> O           | 0.04                       |
| FeSO <sub>4</sub> .7H <sub>2</sub> O           | 0.02                       |
| Na <sub>2</sub> EDTA                           | 0.20                       |
| <b>Micronutrient solution</b>                  | 1 ml                       |
| H <sub>3</sub> BO <sub>3</sub>                 | 2.86                       |
| Na <sub>2</sub> Mo <sub>7</sub> O <sub>4</sub> | 0.02                       |
| CuSO <sub>4</sub> .5H <sub>2</sub> O           | 0.08                       |
| ZnSO <sub>4</sub> .4H <sub>2</sub> O           | 0.22                       |
| MnCl <sub>2</sub> .4H <sub>2</sub> O           | 1.81                       |

**Source:** Madkour et al. 2012; Ragaza et al. 2020

1. Madkour, F. F., Kamil, A. E. W., & Nasr, H. S. (2012). Production and nutritive value of *Spirulina platensis* in reduced cost media. *The Egyptian Journal of Aquatic Research*, 38(1), 51-57.
2. Ragaza, J. A., Hossain, M. S., Meiler, K. A., Velasquez, S. F., & Kumar, V. (2020). A review on *Spirulina*: alternative media for cultivation and nutritive value as an aquafeed. *Reviews in Aquaculture*, 12(4), 2371-2395.

**Table S2: Nutritional requirements for cereal based complementary foods as recommended by Bureau of Indian Standards**

| <b>Nutrient</b>                  | <b>Requirement</b> |
|----------------------------------|--------------------|
| Moisture, % by mass              | NMT 4.0            |
| Total protein, % by mass         | NLT 15.0           |
| Total carbohydrates, % by mass   | NLT 55.0           |
| Crude fiber. % by mass           | NMT 1.0            |
| Total ash, % by mass             | NMT 5.0            |
| Acid insoluble ash, % by mass    | NMT 0.1            |
| Iron, mg/100 g                   | NLT 5.0            |
| Zinc, mg/100 g                   | NLT 2.5            |
| Vitamin A (as retinol), µg/100 g | NLT 350.0          |
| Vitamin C, mg/100 g              | NLT 25.0           |
| Thiamine, mg/100 g               | NLT 0.5            |
| Riboflavin, mg/100 g             | NLT 0.3            |
| Niacin, mg/100g                  | NLT 3.0            |
| Folic acid, µg/100 g             | NLT 20.0           |

NMT – Not more than; NLT – Not less than

Source: Processed-cereal based complementary foods - Specification 11536:2006, December 2006

**Table S3: Colour values of *Spirulina* fortified food products**

| Colour Values | Control                  | <i>Spirulina</i> fortified food products <sup>^</sup> |
|---------------|--------------------------|-------------------------------------------------------|
| <b>Sattu</b>  |                          |                                                       |
| L*            | 78.71±0.07 <sup>a</sup>  | 74.44±0.04 <sup>b</sup>                               |
| a*            | -3.825±0.01 <sup>a</sup> | -5.65±0.01 <sup>b</sup>                               |
| b*            | 13.995±0.02 <sup>a</sup> | 10.64±0.001 <sup>b</sup>                              |
| ΔE            | 64.63±0.08 <sup>a</sup>  | 59.76±0.004 <sup>b</sup>                              |
| <b>Chikki</b> |                          |                                                       |
| L*            | 62.93±0.28 <sup>a</sup>  | 45.83±0.17 <sup>b</sup>                               |
| a*            | -1.66±0.08 <sup>a</sup>  | -3.405±0.03 <sup>b</sup>                              |
| b*            | 15.01±0.18 <sup>a</sup>  | 0.86±0.30 <sup>b</sup>                                |
| ΔE            | 49.98±0.33 <sup>a</sup>  | 29.64±0.21 <sup>b</sup>                               |

Values are mean±SD (n=3).

Values carrying different superscripts are statistically different at p<0.05

<sup>^</sup>*Spirulina* incorporation at 4% w/w

**Table S4: Contribution of *Spirulina* to the RDA of critical nutrients viz., iron and protein**

| Nutrient/ Age group                                         | Plain sattu             | <i>Spirulina</i> fortified sattu | Plain chikki            | <i>Spirulina</i> fortified Chikki |
|-------------------------------------------------------------|-------------------------|----------------------------------|-------------------------|-----------------------------------|
| <b>Protein</b>                                              |                         |                                  |                         |                                   |
| <b>Protein content [g 100 g<sup>-1</sup> food product]*</b> | 12.59±0.65 <sup>a</sup> | 15.15±0.75 <sup>b</sup>          | 16.35±0.82 <sup>a</sup> | 18.91±0.95 <sup>b</sup>           |
| <b>Percent RDA for 3 years@</b>                             | 111.41                  | 134.07                           | 144.69                  | 167.34                            |
| <b>Percent RDA for 4-6 years@</b>                           | 79.18                   | 95.28                            | 102.83                  | 118.93                            |
| <b>Percent RDA for 7-10 years@</b>                          | 54.03                   | 65.02                            | 70.17                   | 81.15                             |
| <b>Iron</b>                                                 |                         |                                  |                         |                                   |
| <b>Iron content [mg 100 g<sup>-1</sup> food product]*</b>   | 1.96±0.05 <sup>a</sup>  | 3.58±0.15 <sup>a</sup>           | 3.85±0.02 <sup>b</sup>  | 5.47±0.27 <sup>b</sup>            |
| <b>Percent RDA for 3 years@</b>                             | 24.5                    | 44.75                            | 48.12                   | 68.38                             |
| <b>Percent RDA for 4-6 years@</b>                           | 17.82                   | 32.55                            | 35.0                    | 49.72                             |
| <b>Percent RDA for 7-10 years@</b>                          | 13.06                   | 23.87                            | 25.66                   | 36.47                             |

\*Values are represented as mean±SD [n=3], determined in the present study [n=3] [refer section 2.4 for methodology and Table 1 for detailed analysis]. Values carrying different superscripts are statistically different at p<0.05

@ Percent RDA determined based on the Recommended Dietary Allowances [RDA]/Estimated Average Requirements for the age group 3 to 10 years as recommended by Indian Council of Medical Research-National Institute of Nutrition, 2020.

**Table S5: Comparison of nutritional quality of *Spirulina* fortified food products [Sattu and Chikki] with commonly consumed foods**

| Nutrients                                                                       | Canned green beans <sup>#</sup> | Raw Broccoli <sup>#</sup> | Ripe Banana fruit <sup>#</sup> | Cooked Chicken <sup>#</sup> | Canned fish, Tuna <sup>#</sup> | Cooked, pan fried Sausage [Pork] <sup>#</sup> | <i>Spirulina</i> fortified Sattu <sup>^</sup> | <i>Spirulina</i> fortified Chikki <sup>^</sup> | RDA requirements for 3 to 10 years <sup>@</sup> |
|---------------------------------------------------------------------------------|---------------------------------|---------------------------|--------------------------------|-----------------------------|--------------------------------|-----------------------------------------------|-----------------------------------------------|------------------------------------------------|-------------------------------------------------|
| <b>Macronutrients</b>                                                           |                                 |                           |                                |                             |                                |                                               |                                               |                                                |                                                 |
| Moisture g 100 g <sup>-1</sup>                                                  | 93.60                           | 90.00                     | 75.30                          | 69.90                       | 79.00                          | 50.90                                         | 3.64                                          | 2.89                                           | -                                               |
| Total Energy <sup>**</sup> , KCal 100 g <sup>-1</sup>                           | 24.00                           | 39.00                     | 98.00                          | 149.00                      | 85.00                          | 317.00                                        | 409.05                                        | 510.42                                         | 1110 - 1700 KCal/day                            |
| Crude Protein g 100 g <sup>-1</sup> (N × 6.25)                                  | 1.04                            | 2.57                      | 0.74                           | 23.90                       | 19.00                          | 18.20                                         | 15.15                                         | 18.91                                          | 12.50 - 23.00 g/day                             |
| Total Fat: g 100 g <sup>-1</sup>                                                | 0.39                            | 0.34                      | 0.29                           | 5.95                        | 0.94                           | 26.20                                         | 3.65                                          | 23.54                                          | 25.00 - 30.00 g/day                             |
| Total Carbohydrates, g 100 g <sup>-1</sup> (by difference method) <sup>**</sup> | 4.11                            | 6.27                      | 23.00                          | 0.00                        | 0.08                           | 2.15                                          | 75.31                                         | 55.73                                          | 130.00 g/day                                    |
| <b>Minerals</b>                                                                 |                                 |                           |                                |                             |                                |                                               |                                               |                                                |                                                 |
| Total Ash g 100 g <sup>-1</sup>                                                 | 0.89                            | 0.83                      | 0.70                           | 0.98                        | NR                             | 2.63                                          | 2.25                                          | 1.82                                           | --                                              |
| Iron, mg 100 g <sup>-1</sup>                                                    | 0.78                            | 0.69                      | 0.40                           | 0.94                        | 1.67                           | 1.29                                          | 3.58                                          | 5.47                                           | 8.00-15.00 mg/day                               |
| Magnesium, mg 100 g <sup>-1</sup>                                               | 12.70                           | 21.00                     | 28.00                          | 22.40                       | 22.70                          | 18.60                                         | 122.69                                        | 170.45                                         | 90.00-175.00 mg/day                             |
| Calcium, mg 100 g <sup>-1</sup>                                                 | 36.00                           | 46.00                     | 5.00                           | 12.00                       | 18.00                          | 12.00                                         | 177.52                                        | 81.97                                          | 500.00-650.00 mg/day                            |
| Zinc, mg 100 g <sup>-1</sup>                                                    | 0.19                            | 0.42                      | 0.16                           | 2.54                        | 0.66                           | 2.41                                          | 2.35                                          | 1.75                                           | 3.30-5.90 mg/day                                |
| Phosphorus, mg 100 g <sup>-1</sup>                                              | 23.00                           | 67.00                     | 22.00                          | 184.00                      | 137.00                         | 145.00                                        | 350.49                                        | 285.41                                         | 1000.00 mg/day                                  |
| Potassium, mg 100 g <sup>-1</sup>                                               | 97.00                           | 303.00                    | 326.00                         | 239.00                      | 176.00                         | 310.00                                        | 735.68                                        | 595.93                                         | 3500.00 mg/day                                  |

<sup>\*\*</sup>Calculated value; (--) No recommendations; NR – Not Reported

<sup>#</sup>USDA, 2019 [U.S. Department of Agriculture, Agricultural Research Service. Food Data Central [FDC], 2019. [fdc.nal.usda.gov](http://fdc.nal.usda.gov)].



FDC ID: Canned Beans – 321611; Raw Broccoli – 747447; Ripe Bananas – 1105314; Cooked Chicken – 331897; Canned fish Tuna – 334194; Cooked, pan fried Sausage - 746780

^Values from the present study [refer Table 1 for the detailed nutritional composition of Spirulina fortified foods].

@Recommended Dietary Allowances [RDA]/Estimated Average Requirements for the age group 3 to 10 years as recommended by Indian Council of Medical Research-National Institute of Nutrition, 2020.

**Table S6 - Essential amino acid scoring of *Spirulina* fortified food products**

| Amino acid scoring                                           | His   | Ile   | Leu   | Lys   | SAA   | AAA   | Thr   | Trp   | Val   |
|--------------------------------------------------------------|-------|-------|-------|-------|-------|-------|-------|-------|-------|
| EAA requirements for 3 yrs to 10 yrs mg/g protein (FAO 2007) | 16.00 | 31.00 | 61.00 | 48.00 | 24.00 | 41.00 | 25.00 | 6.60  | 40.00 |
| <i>Spirulina</i> fortified chikki mg/g protein               | 20.10 | 24.85 | 58.70 | 44.42 | 38.60 | 72.98 | 72.98 | 8.99  | 32.26 |
| <i>Spirulina</i> fortified Sattu mg/g protein                | 13.59 | 19.48 | 48.48 | 40.33 | 21.30 | 43.95 | 24.92 | 20.39 | 24.92 |
| <i>Spirulina</i> biomass mg/g protein                        | 8.45  | 23.78 | 44.27 | 27.38 | 42.87 | 55.38 | 30.04 | 14.22 | 31.60 |
| AA Scoring Chikki                                            | 1.26  | 0.80  | 0.96  | 0.93  | 1.61  | 1.78  | 2.92  | 1.36  | 0.81  |
| AA scoring sattu                                             | 0.85  | 0.63  | 0.79  | 0.84  | 0.89  | 1.07  | 0.99  | 3.09  | 0.62  |
| AA scoring <i>Spirulina</i> biomass                          | 0.53  | 0.77  | 0.73  | 0.57  | 1.78  | 1.35  | 1.20  | 2.15  | 0.79  |

EAA – Essential Amino acids

FAO – Food and Agriculture Organization

SAA – Sulphur containing amino acids

AAA – Aromatic amino acids

**Table S7– Amino acid composition of *Spirulina* fortified food products**

| <b>Amino acids</b>              | <b>Plain Sattu</b>      | <b><i>Spirulina</i> fortified sattu</b> | <b>Plain chikki</b>     | <b><i>Spirulina</i> fortified chikki</b> | <b><i>Spirulina</i> biomass</b> | <b>Casein<sup>^</sup></b> |
|---------------------------------|-------------------------|-----------------------------------------|-------------------------|------------------------------------------|---------------------------------|---------------------------|
| <b>Total protein (N x 6.25)</b> | 12.59±0.65 <sup>a</sup> | 15.15±0.75 <sup>b</sup>                 | 16.35±0.82 <sup>a</sup> | 18.91±0.95 <sup>b</sup>                  | 63.92±0.47                      | 92.00                     |
| Alanine                         | 0.75±0.02 <sup>a</sup>  | 0.86±0.02 <sup>b</sup>                  | 0.73±0.02 <sup>a</sup>  | 0.85±0.02 <sup>b</sup>                   | 3.62±0.14                       | 3.40                      |
| Arginine*                       | 0.68±0.02 <sup>a</sup>  | 0.72±0.09 <sup>b</sup>                  | 0.55±0.02 <sup>a</sup>  | 0.59±0.01 <sup>b</sup>                   | 1.56±0.06                       | 4.10                      |
| Aspartic Acid                   | 1.65±0.05 <sup>a</sup>  | 1.92±0.05 <sup>b</sup>                  | 2.20±0.08 <sup>a</sup>  | 2.63±0.07 <sup>b</sup>                   | 4.04±0.16                       | 7.40                      |
| Cystein+Cystine                 | 0.28±0.01               | 0.30±0.01                               | 0.53±0.02               | 0.58±0.02                                | 2.06±0.08                       | 0.40                      |
| Glutamic acid                   | 3.62±0.11 <sup>a</sup>  | 4.58±0.11 <sup>b</sup>                  | 3.41±0.12 <sup>a</sup>  | 4.64±0.13 <sup>b</sup>                   | 6.63±0.26                       | 23.20                     |
| Glycine                         | 0.90±0.03 <sup>a</sup>  | 1.03±0.02 <sup>b</sup>                  | 1.62±0.06 <sup>a</sup>  | 1.91±0.05 <sup>b</sup>                   | 3.74±0.15                       | 2.10                      |
| Histidine*                      | 0.30±0.01               | 0.31±0.01                               | 0.37±0.01               | 0.38±0.01                                | 0.54±0.02                       | 3.20                      |
| Isoleucine*                     | 0.43±0.01               | 0.46±0.01                               | 0.44±0.01               | 0.47±0.01                                | 1.52±0.06                       | 6.60                      |
| Leucine*                        | 1.07±0.03 <sup>a</sup>  | 1.19±0.03 <sup>b</sup>                  | 0.98±0.03 <sup>a</sup>  | 1.11±0.03 <sup>b</sup>                   | 2.83±0.11                       | 10.0                      |
| Lysine*                         | 0.89±0.03 <sup>a</sup>  | 0.95±0.02 <sup>b</sup>                  | 0.78±0.03 <sup>a</sup>  | 0.84±0.02 <sup>b</sup>                   | 1.75±0.07                       | 8.10                      |
| Methionine*                     | 0.19±0.01               | 0.20±0.01                               | 0.15±0.01               | 0.15±0.01                                | 0.68±0.03                       | 3.20                      |
| Phenylalanine*                  | 0.60±0.02 <sup>a</sup>  | 0.64±0.02 <sup>b</sup>                  | 0.75±0.03 <sup>a</sup>  | 0.81±0.02 <sup>b</sup>                   | 1.75±0.07                       | 5.40                      |
| Proline                         | 1.03±0.03               | 1.07±0.03                               | 0.91±0.03               | 0.95±0.03                                | 1.075±0.04                      | 11.80                     |
| Serine                          | 0.76±0.02               | 0.80±0.02                               | 0.95±0.03               | 1.01±0.03                                | 1.43±0.06                       | 6.60                      |
| Threonine*                      | 0.55±0.02 <sup>a</sup>  | 0.59±0.01 <sup>b</sup>                  | 1.27±0.04 <sup>a</sup>  | 1.38±0.04 <sup>b</sup>                   | 1.92±0.08                       | 4.30                      |
| Tyrosine*                       | 0.37±0.01               | 0.40±0.01                               | 0.53±0.02               | 0.57±0.01                                | 1.79±0.07                       | 5.80                      |
| Tryptophan*                     | 0.45±0.01               | 0.47±0.01                               | 0.17±0.01               | 0.18±0.01                                | 0.909±0.04                      | 1.30                      |
| Valine*                         | 0.55±0.02               | 0.59±0.02                               | 0.56±0.02               | 0.61±0.02                                | 2.02±0.08                       | 7.50                      |
| ΣEAA <sup>#</sup>               | 6.08                    | 6.52                                    | 6.57                    | 7.09                                     | 17.27                           | 59.50                     |
| IVPD%                           | 88.00±0.80              | 89.00±0.44                              | 88.37±0.6               | 89.00±0.45                               | 83.00±1.15                      | 97.00                     |

\*Essential amino acids. #Sum of essential amino acids. Values expressed as g 100 g<sup>-1</sup> food product. Values are mean±SD of triplicate analysis, values carrying different superscripts are statistically significant at p≤0.05

**^Source**

1. Devendra C. 1980. Milk production in goats compared to buffalo and cattle in humid tropics. *J Dairy Sci* 63(10):1755–67.
2. Park YW. 2011. Milks of other domesticated mammals (Pigs, Yaks, Reindeer, etc.). In: Fuquay JW, Fox PF and McSweeney PLH (eds.), *Encyclopedia of Dairy Sciences*, Second Edition, vol. 3, pp. 530–537. San Diego: Academic Press.

\*\*\*
