# Supplementary material for: Arthrospira platensis (Spirulina) fortified functional foods ameliorate iron and protein malnutrition by improving growth and modulating oxidative stress and gut microbiota in rats
Source: Royal Society of Chemistry journal article supplement (doi:10.1039/d2fo02226e), 2022-12-19
Supplement: d2fo02226e3.pdf [file d2fo02226e3.pdf]

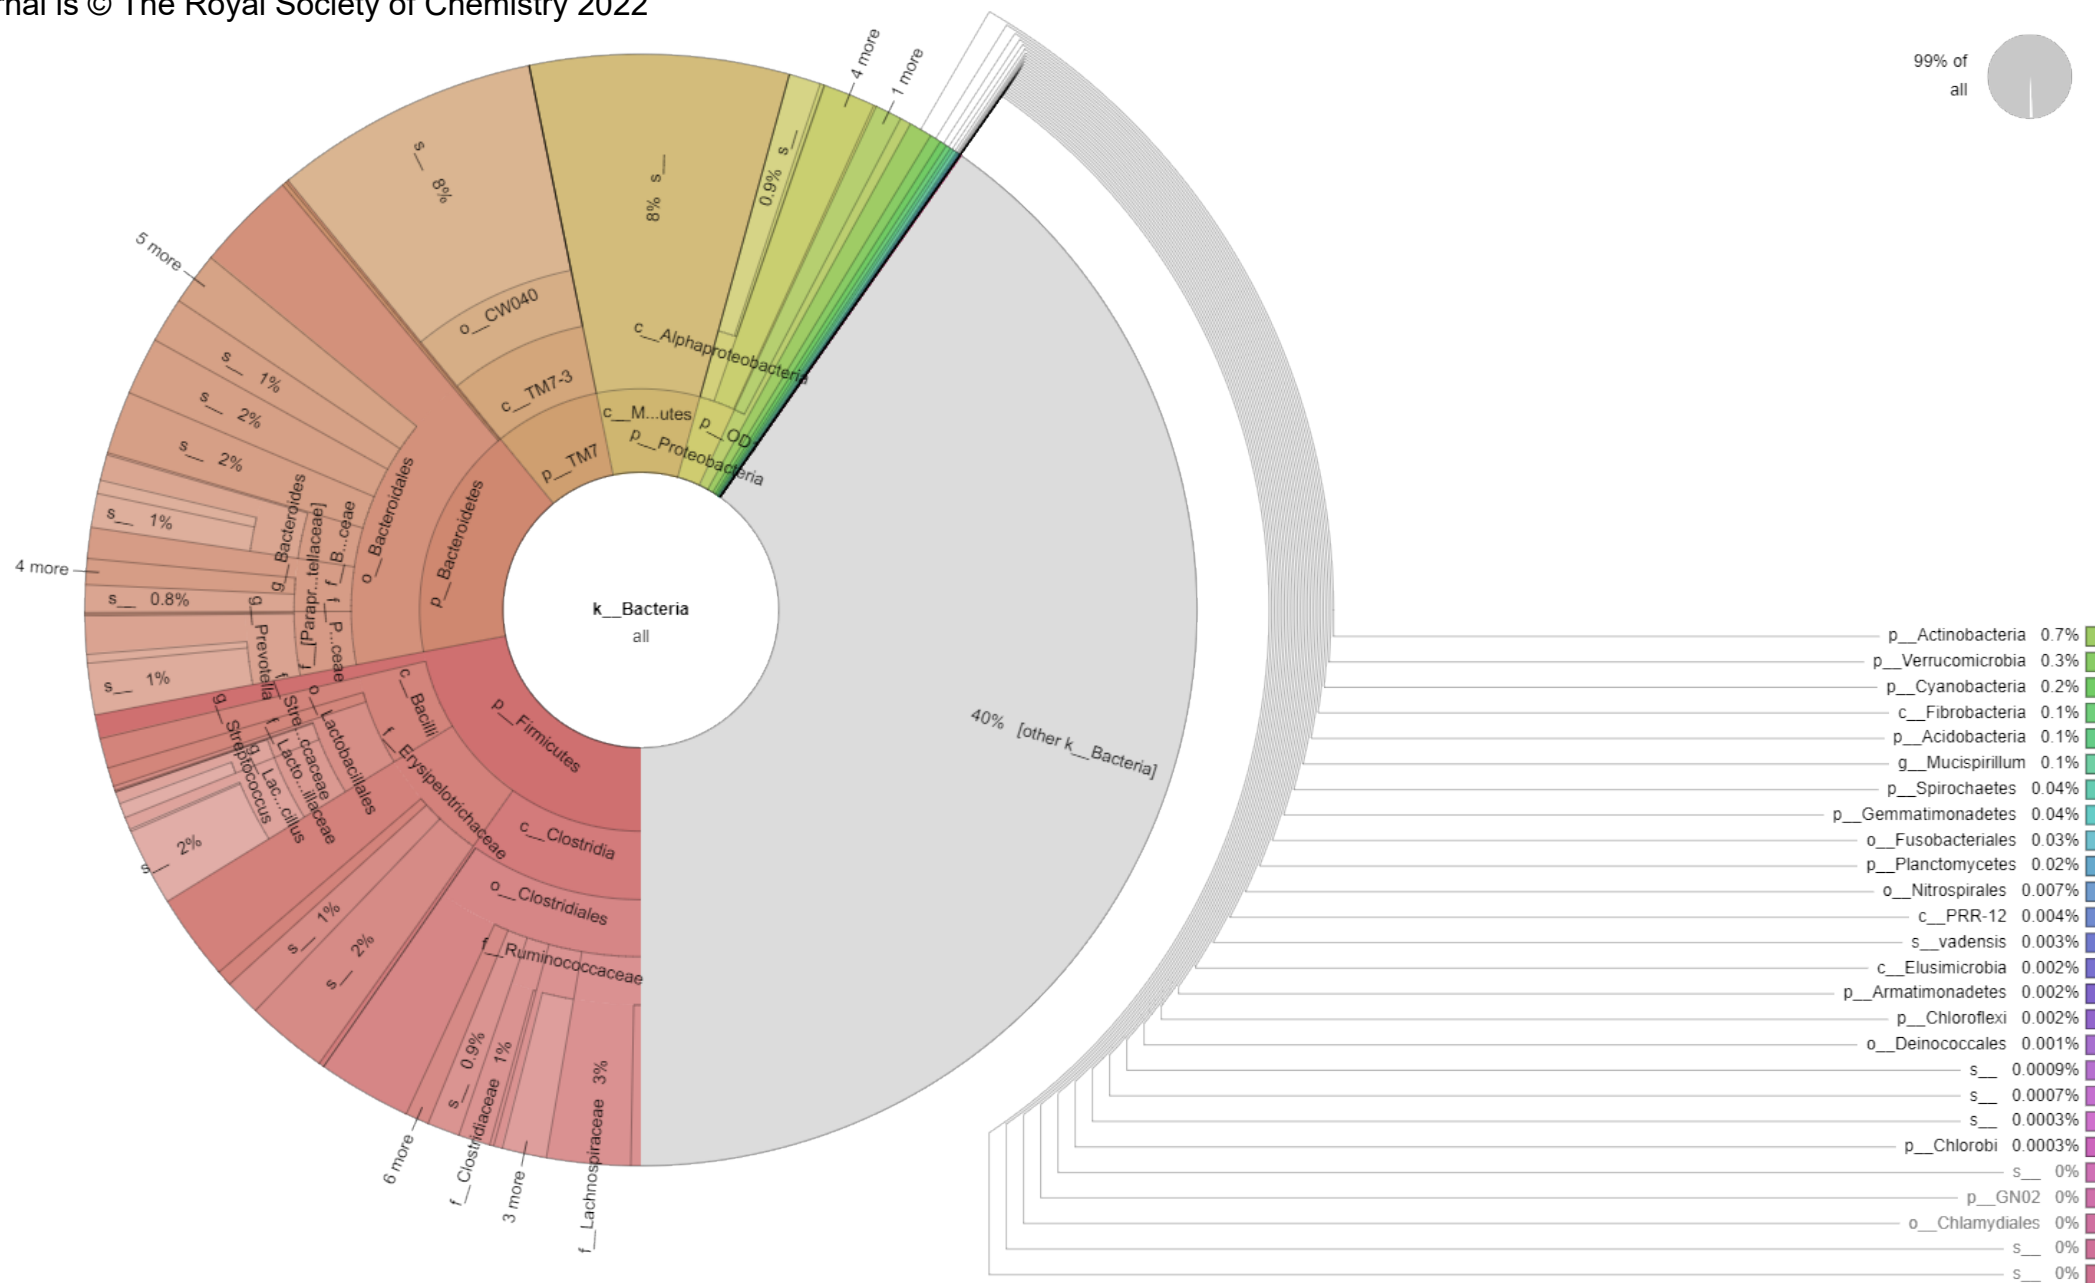

NC-Normal Control

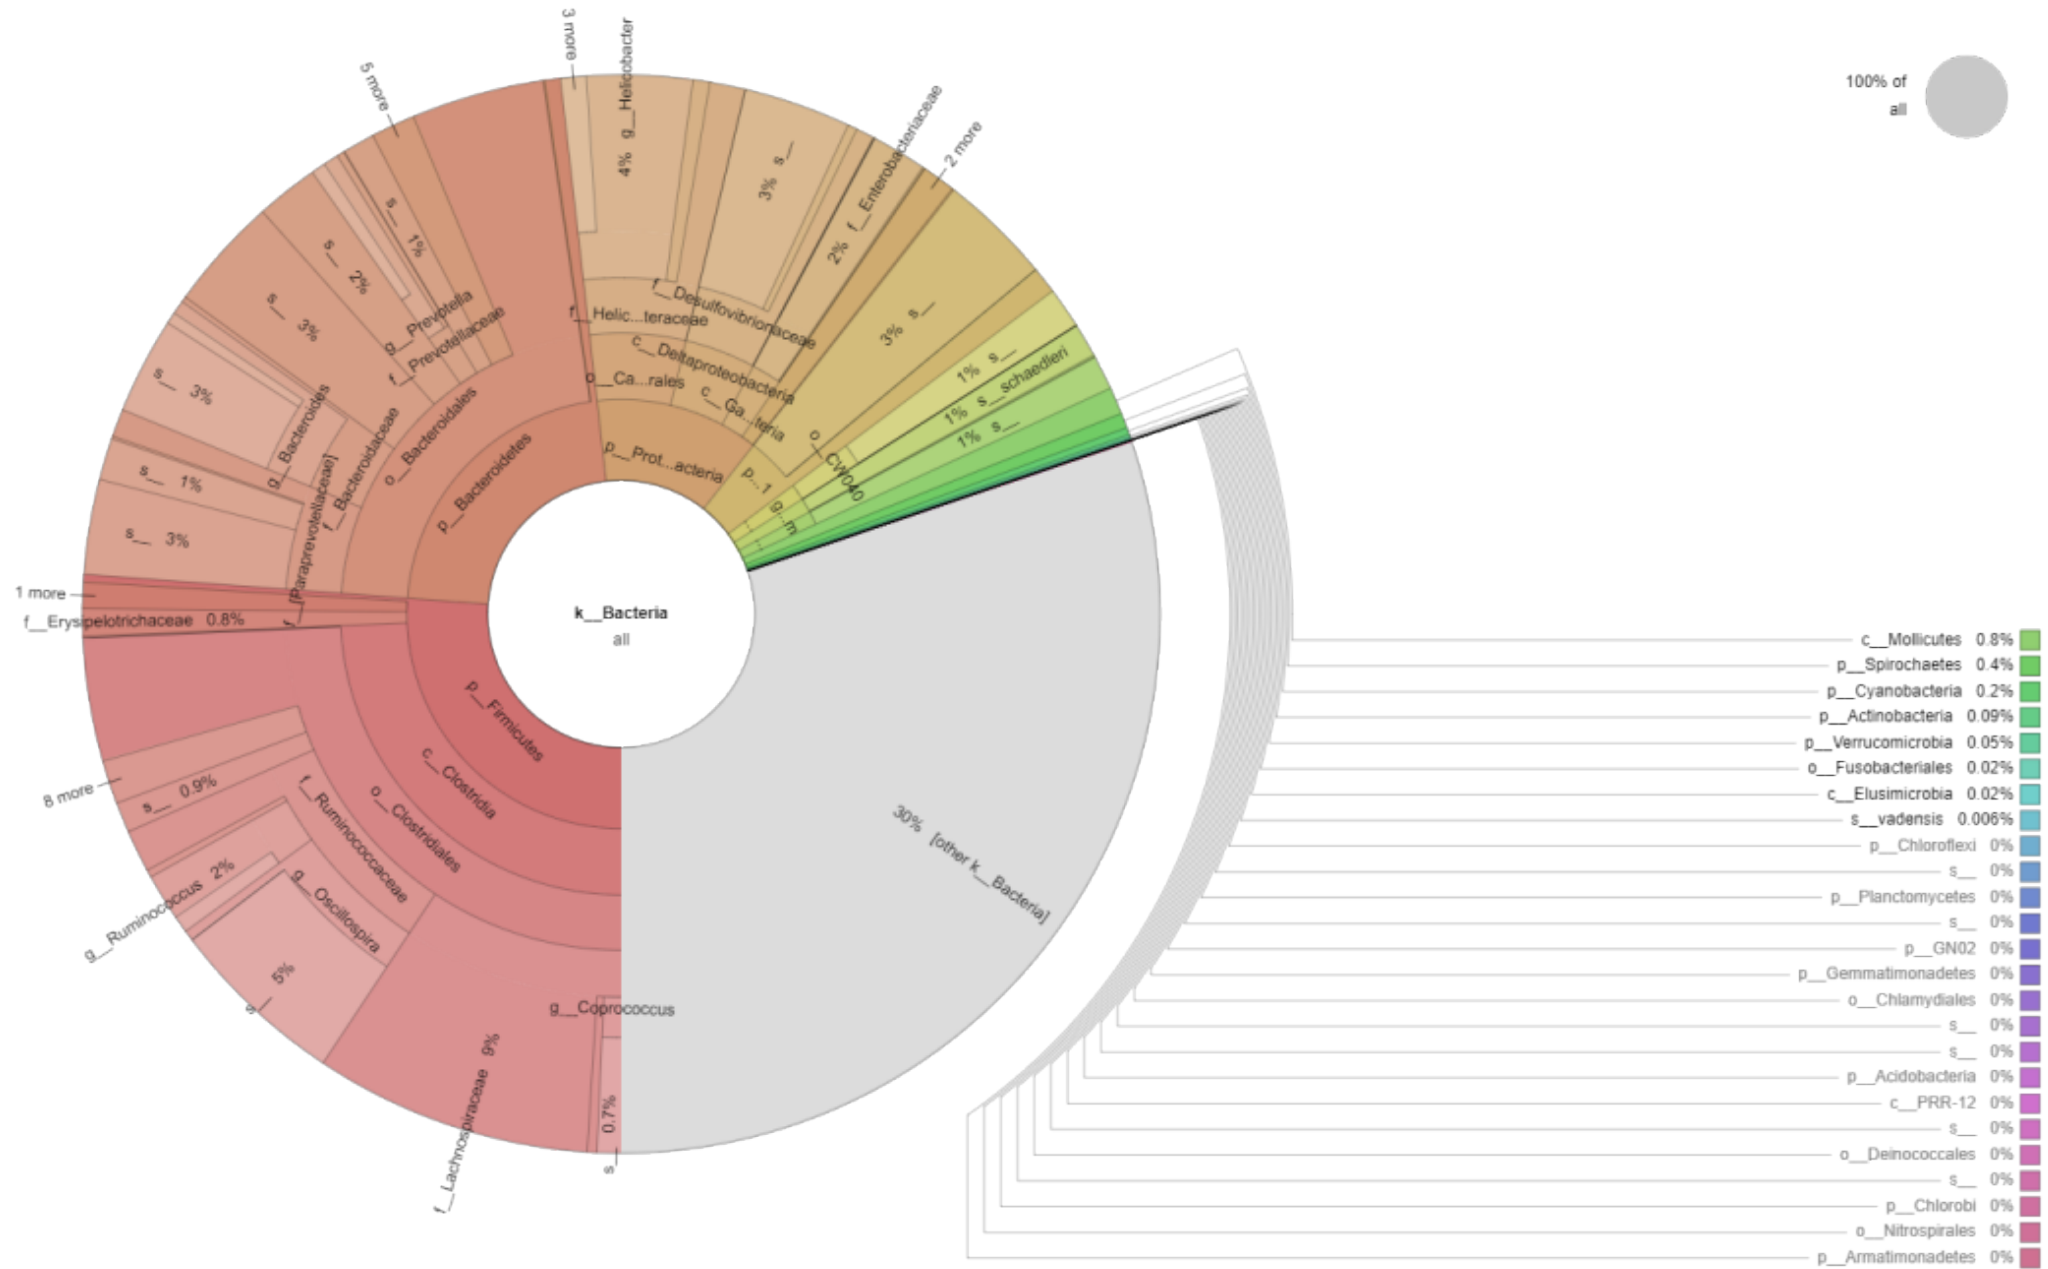

DC-Disease control receiving Fe-protein deficient diet

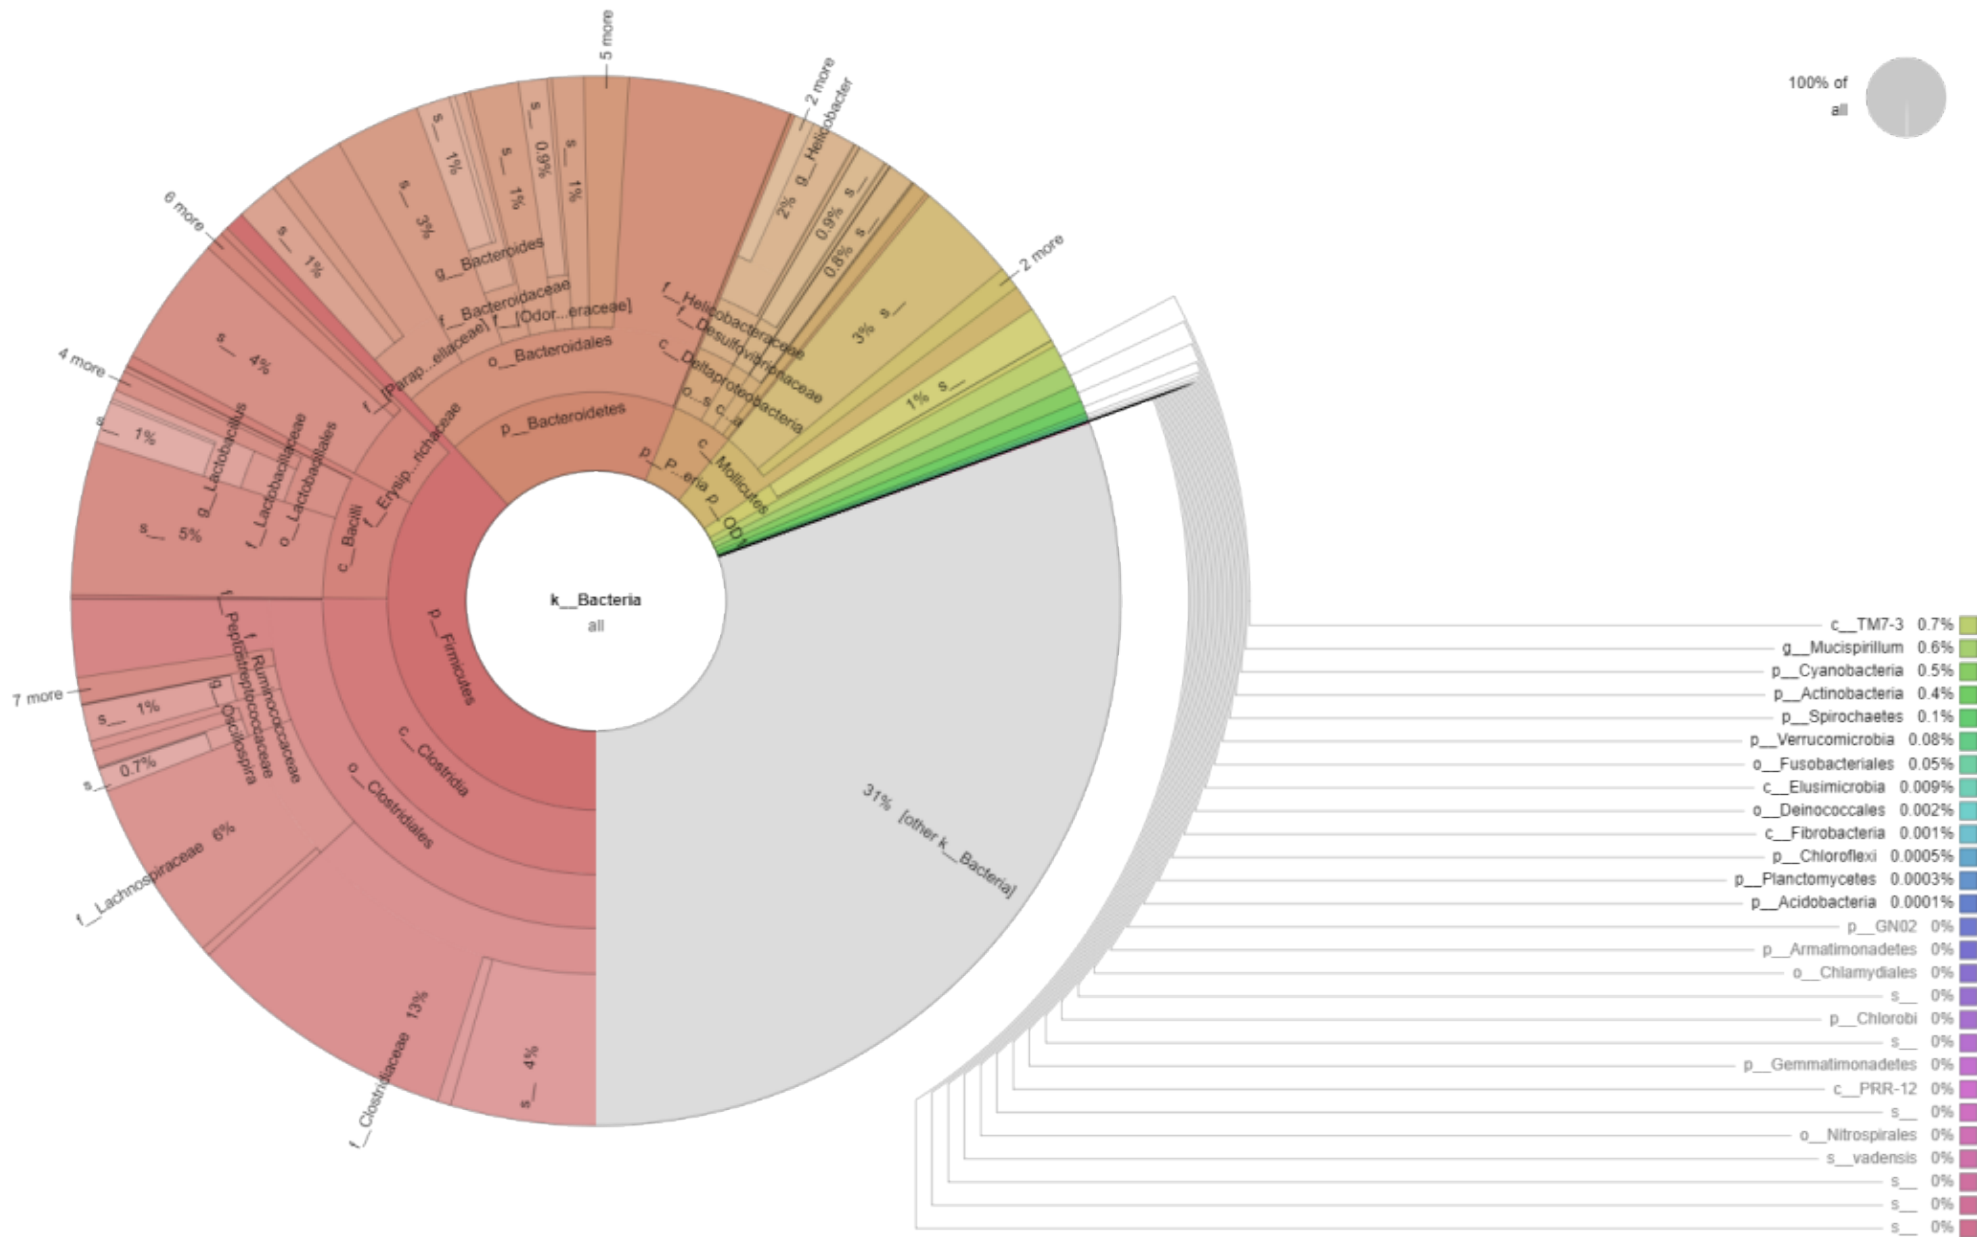

**SR - Recovery with AIN 93G diet**

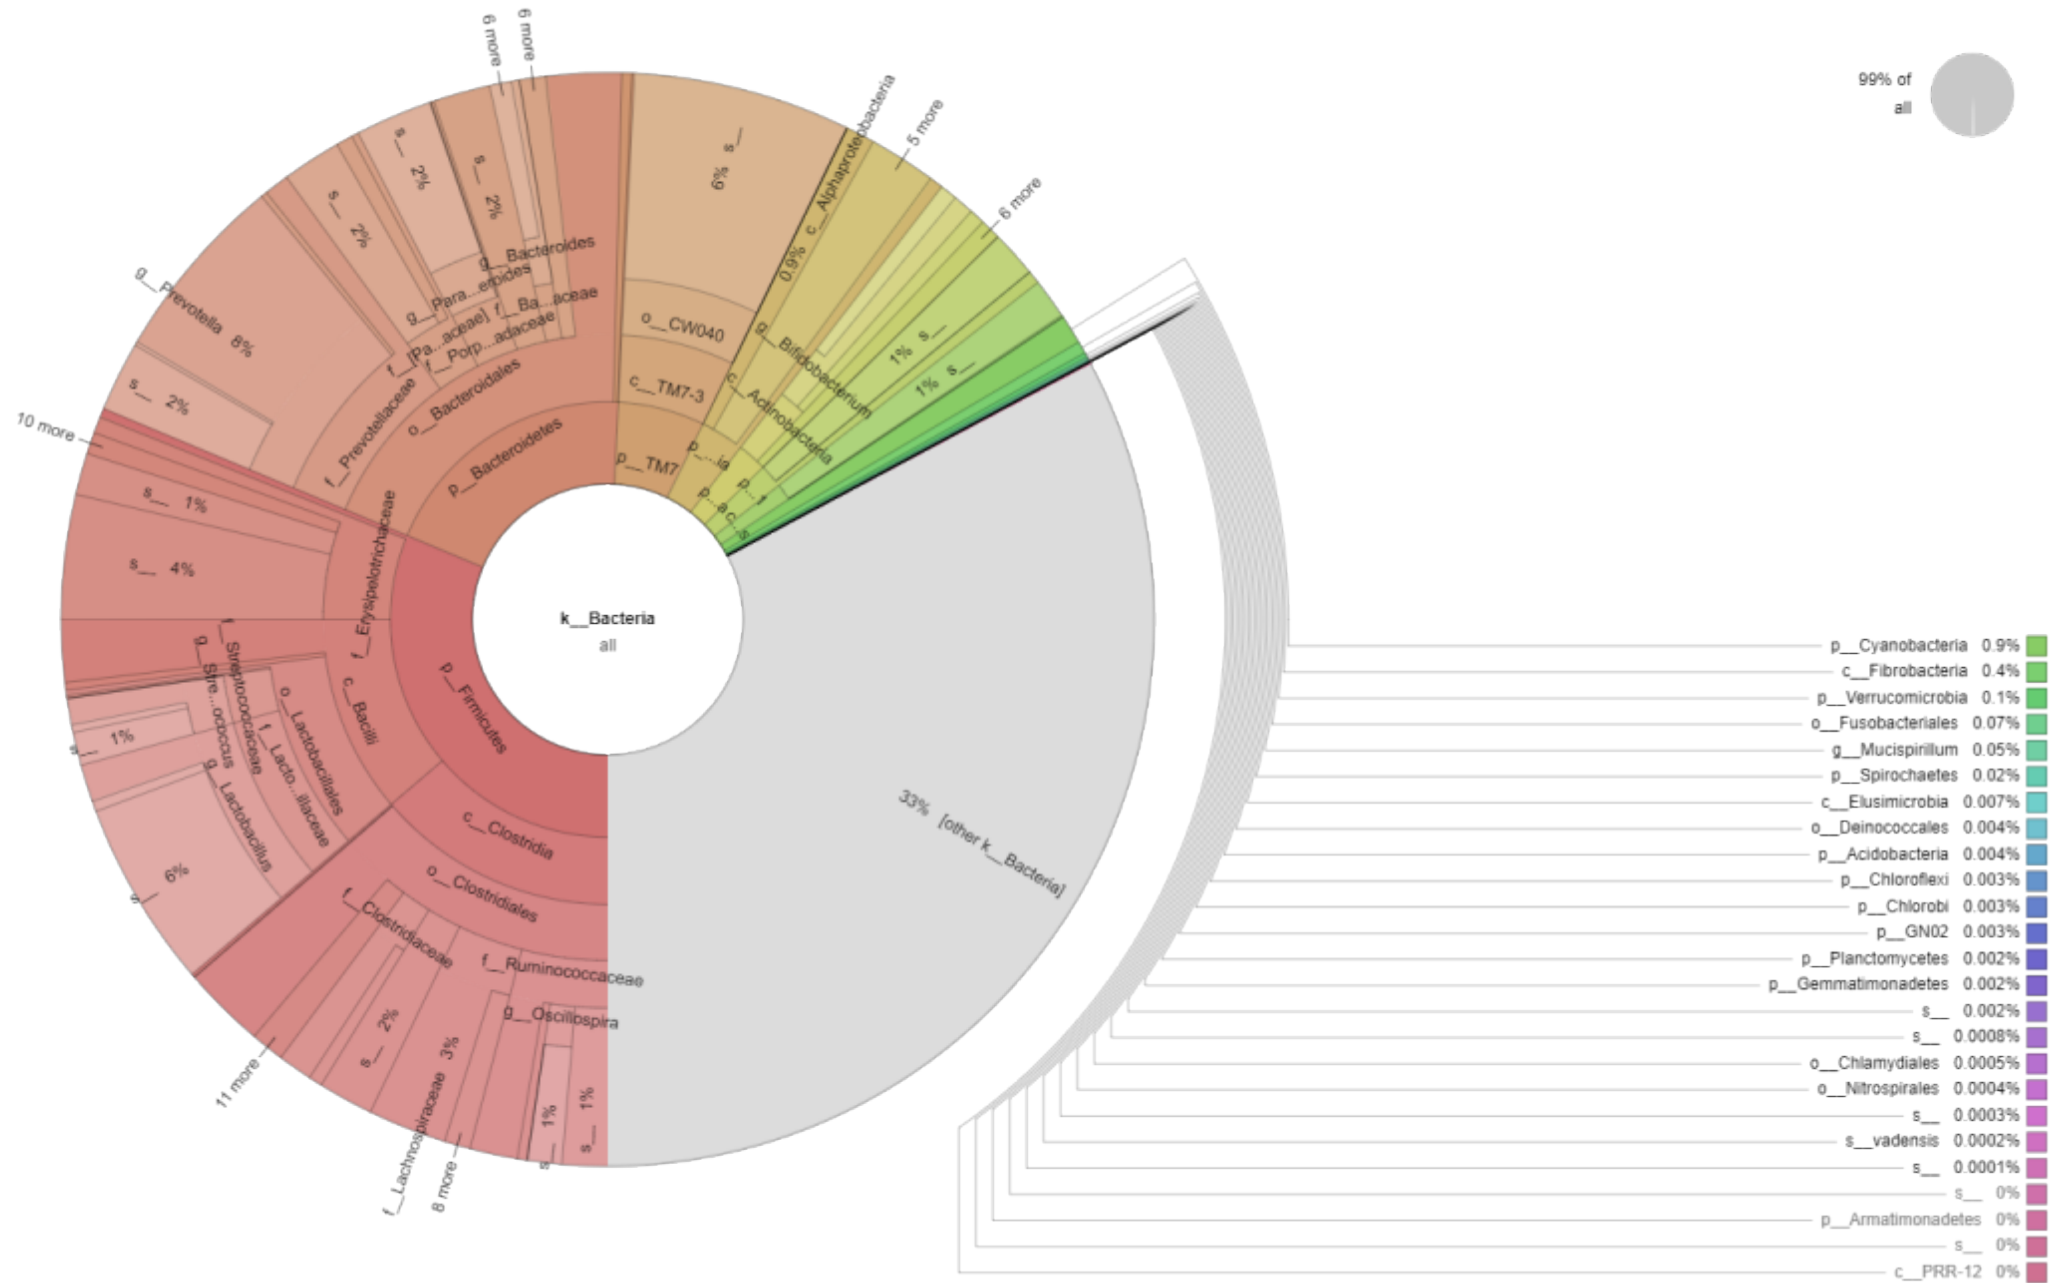

ChR - Recovery with *Spirulina* fortified chikki

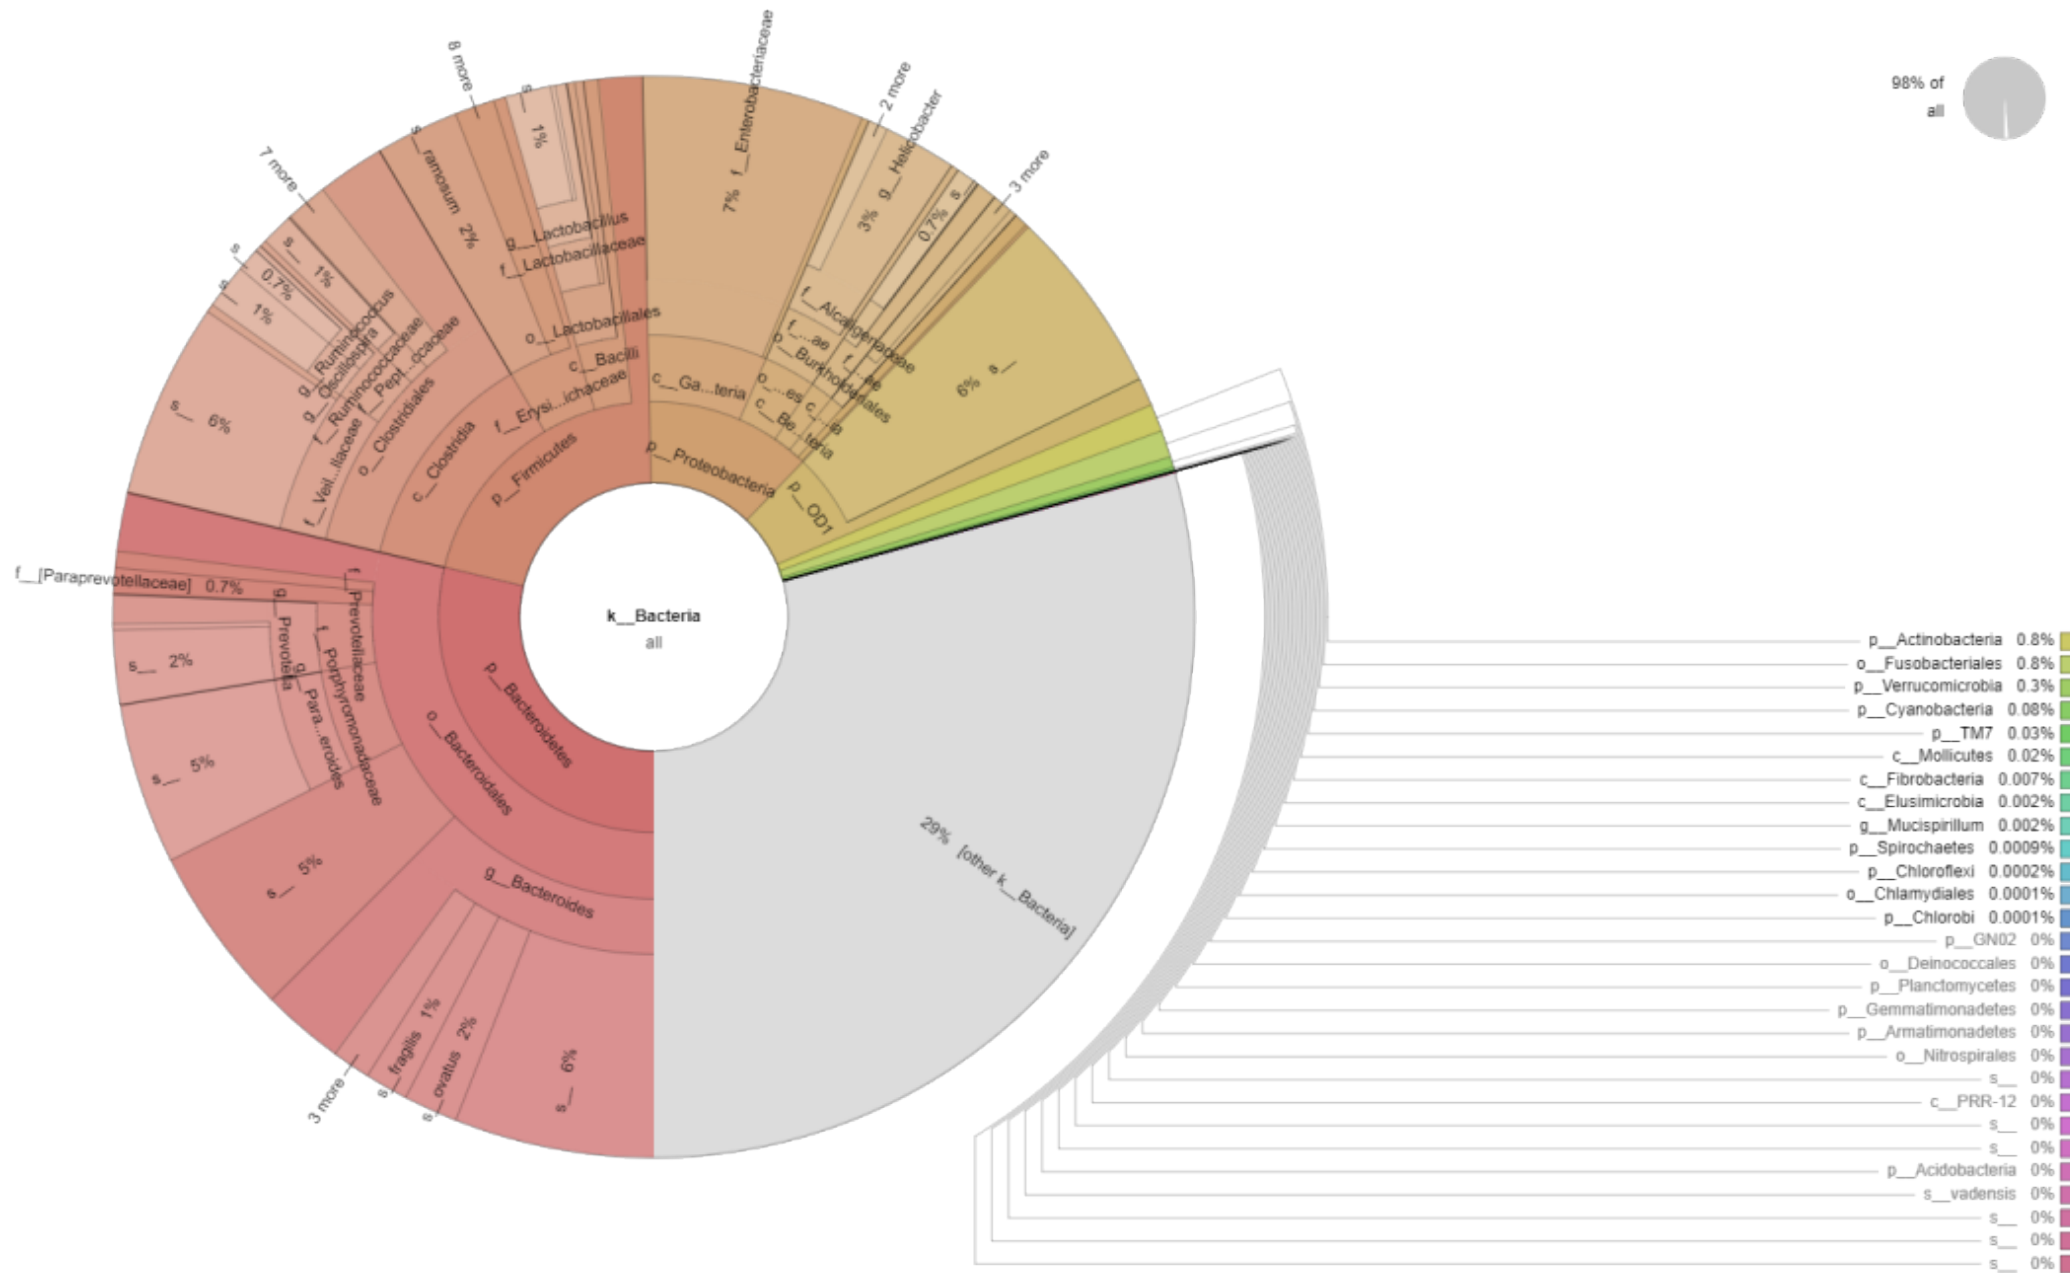

SpR - Recovery with *Spirulina* fortified AIN93G diet

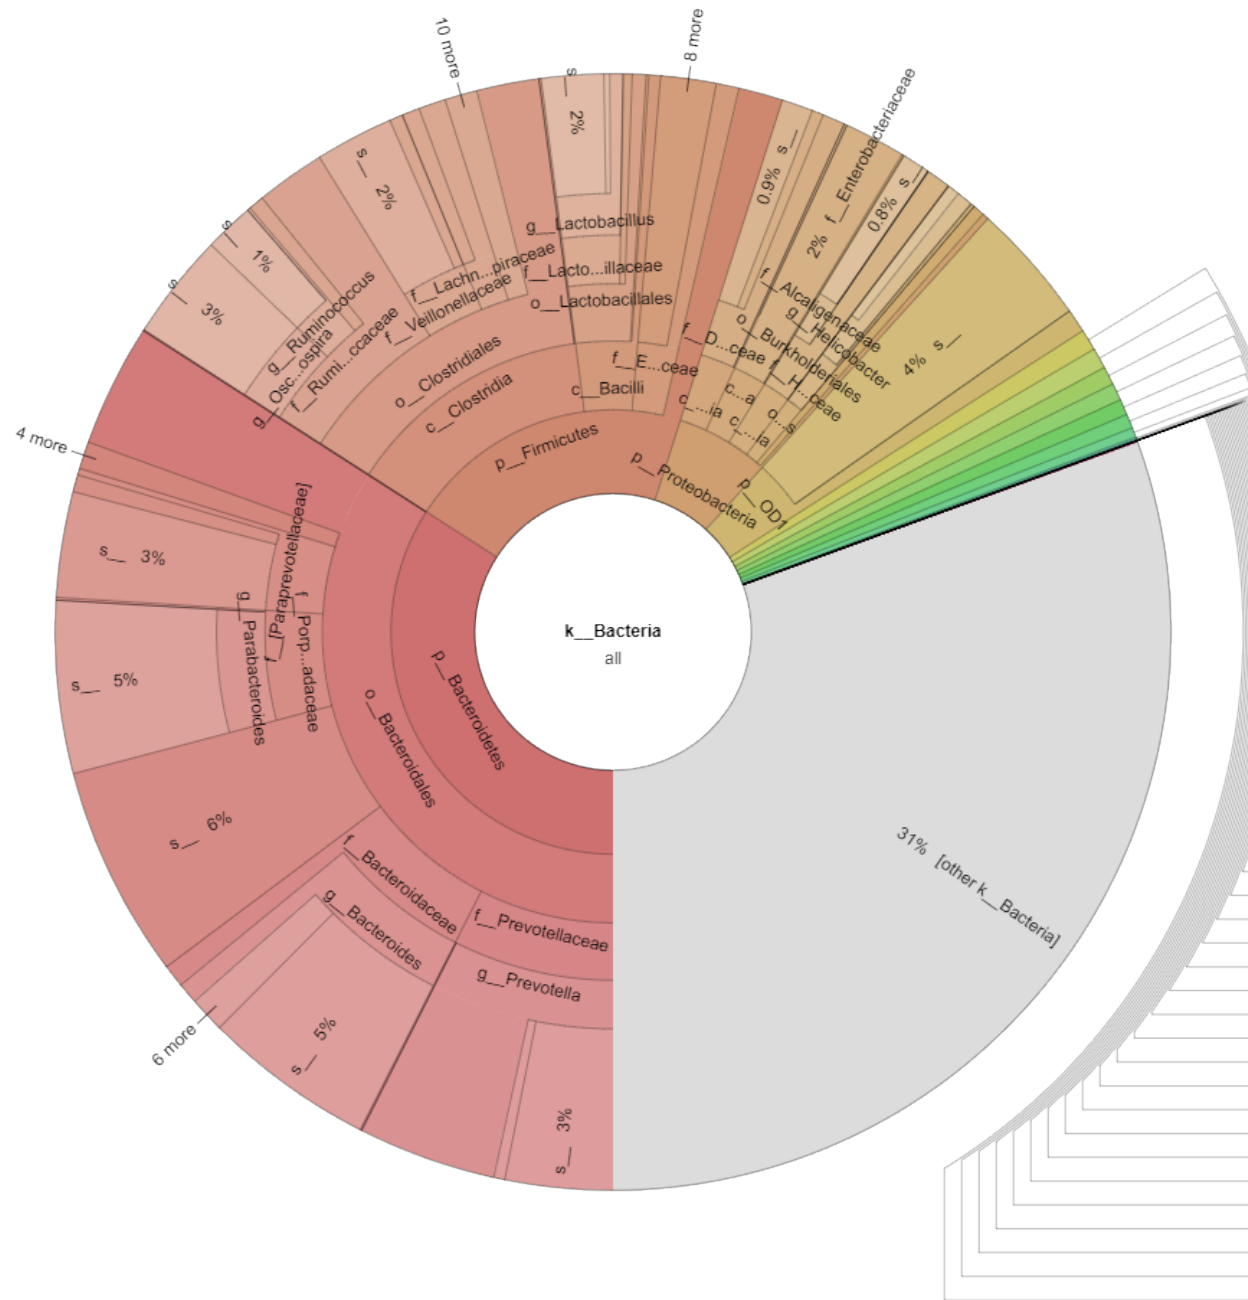

99% of all

- p\_\_Cyanobacteria 0.6%
- o\_\_Fusobacteriales 0.6%
- p\_\_Verrucomicrobia 0.5%
- c\_\_TM7-3 0.5%
- p\_\_Actinobacteria 0.5%
- c\_\_Fibrobacteria 0.4%
- c\_\_Mollicutes 0.3%
- g\_\_Mucispirillum 0.05%
- p\_\_Spirochaetes 0.03%
- c\_\_Elusimicrobia 0.02%
- s\_\_ 0.0007%
- p\_\_Chlorobi 0.0007%
- p\_\_Gemmatimonadetes 0.0005%
- p\_\_Acidobacteria 0.0002%
- s\_\_vadensis 0.0001%
- s\_\_ 0%
- o\_\_Deinococcales 0%
- p\_\_Chloroflexi 0%
- o\_\_Chlamydiales 0%
- s\_\_ 0%
- p\_\_Armatimonadetes 0%
- s\_\_ 0%
- o\_\_Nitrospirales 0%
- p\_\_Planctomycetes 0%
- s\_\_ 0%
- p\_\_GN02 0%
- c\_\_PRR-12 0%
- s\_\_ 0%

PR - Recovery with *Spirulina* fortified sattu
